# Supplementary material
Source: PubMed Central journal article supplement (PMC7654958)
Supplement: NIHMS1570410-supplement-CTGF-SI.pdf [file NIHMS1570410-supplement-CTGF-SI.pdf]

## Supporting Information

### Induction of Fibrogenic Phenotype in Human Mesenchymal Stem Cells by Connective Tissue Growth Factor in a Hydrogel Model of Soft Connective Tissue

Aidan B. Zerdoum,<sup>1±</sup> Eric W. Fowler,<sup>2±</sup> and Xinqiao Jia<sup>1,2,3\*</sup>

<sup>1</sup>Department of Biomedical Engineering, University of Delaware, Newark, DE 19716, USA

<sup>2</sup>Department of Materials Science and Engineering, University of Delaware, Newark, DE 19716, USA

<sup>3</sup>Delaware Biotechnology Institute, University of Delaware, Newark, DE 19711, USA

*Supporting information:*  
Eight supplementary pages  
Six supplementary figures  
One supplementary table

## Supporting Information

### Synthesis of HA-SH.

HA (430 kDa, 1.25 mmol), dissolved in deionized (DI) water at 10 mg/mL, was reacted with 3,3'-dithiobis-propanoic dihydrazide (DTP, 2.5 mmol), utilizing 1-ethyl-3-(3-(dimethylamino)propyl) carbodiimide hydrochloride (EDC, 1.88 mmol) activation. The reaction was allowed to proceed at pH 4.75 for 1 h under mechanical stirring. Upon adjusting the solution pH to 8.0, dithiothreitol (DTT, 16.21 mmol) was added to reduce disulfide bonds. After 48-h dialysis (MWCO: 10 kDa) against 0.1 M NaCl at pH 3.5, followed by 24-h dialysis against DI water at pH 3.5, the solution was sterilized by filtration through a 0.22  $\mu\text{m}$  filter and lyophilized to yield the dry product.

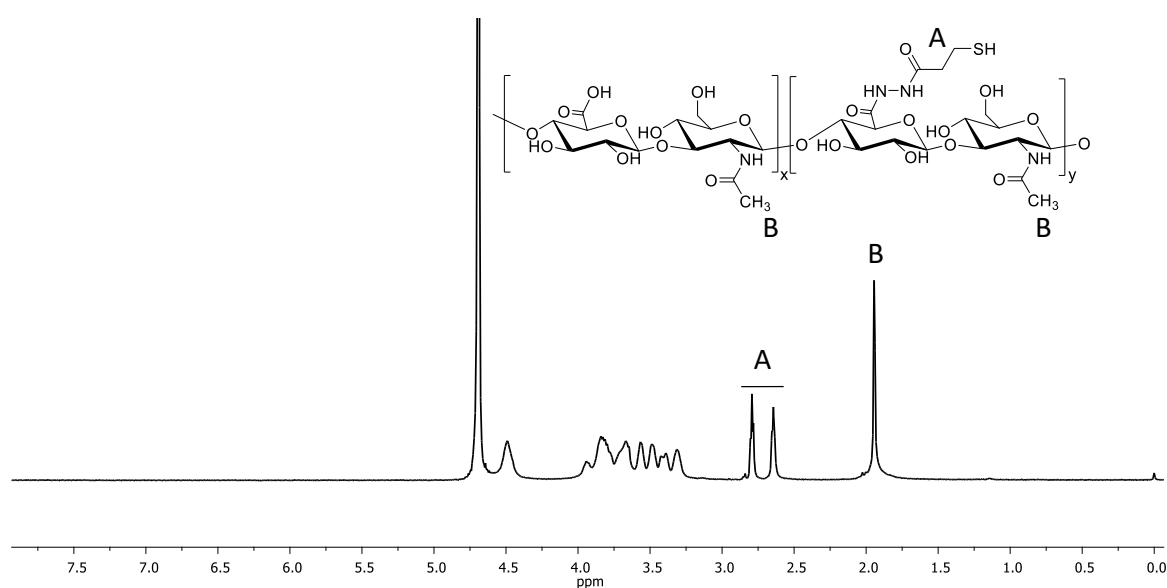

**Figure S1.**  $^1\text{H-NMR}$  spectrum of HA-SH in  $\text{D}_2\text{O}$ . The degree of modification was determined by comparing the integrations for methylene protons from DTP (A) and the acetamide group (B) in HA.

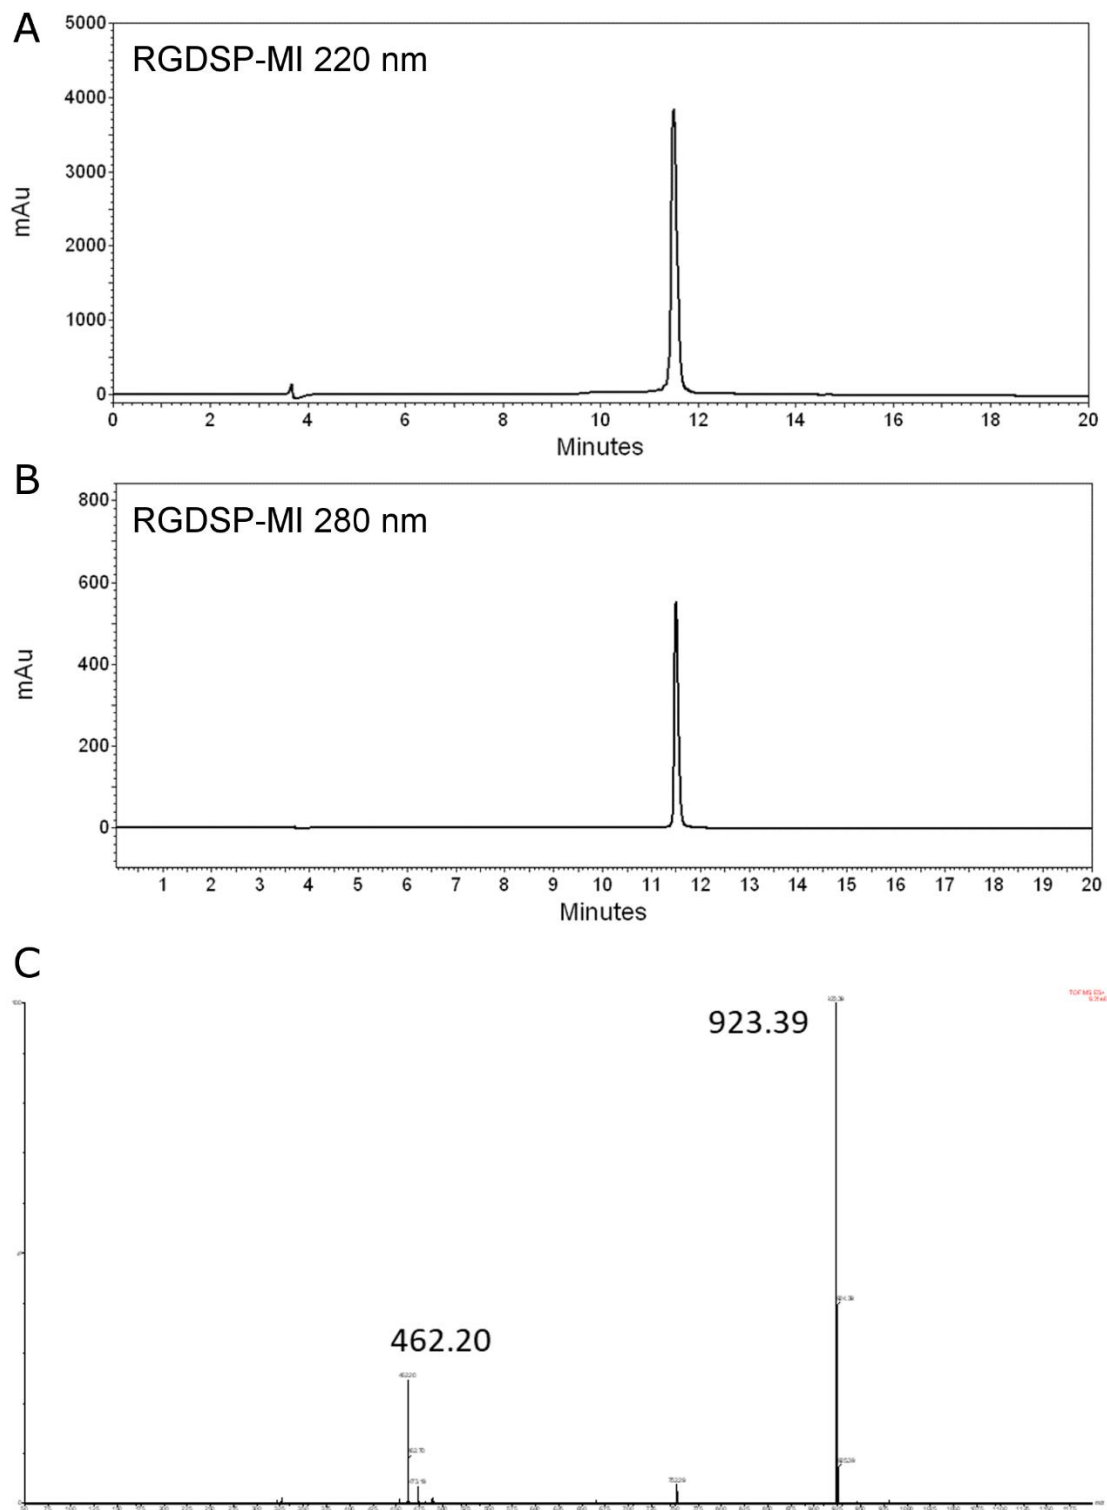

**Figure S2.** Characterization of RGDSP-MI. (A-B): Analytical HPLC trace of RGDSP-MI at 200 nm (A) and 280 nm (B). (C): ESI-MS spectrum confirming the mass of the peptide with a sequence MI-GGGRGDSPG. Exact Mass= 922.4; Observed:  $[M+H]^+ = 923.39$ ,  $[M+2H]^{2+} = 462.20$

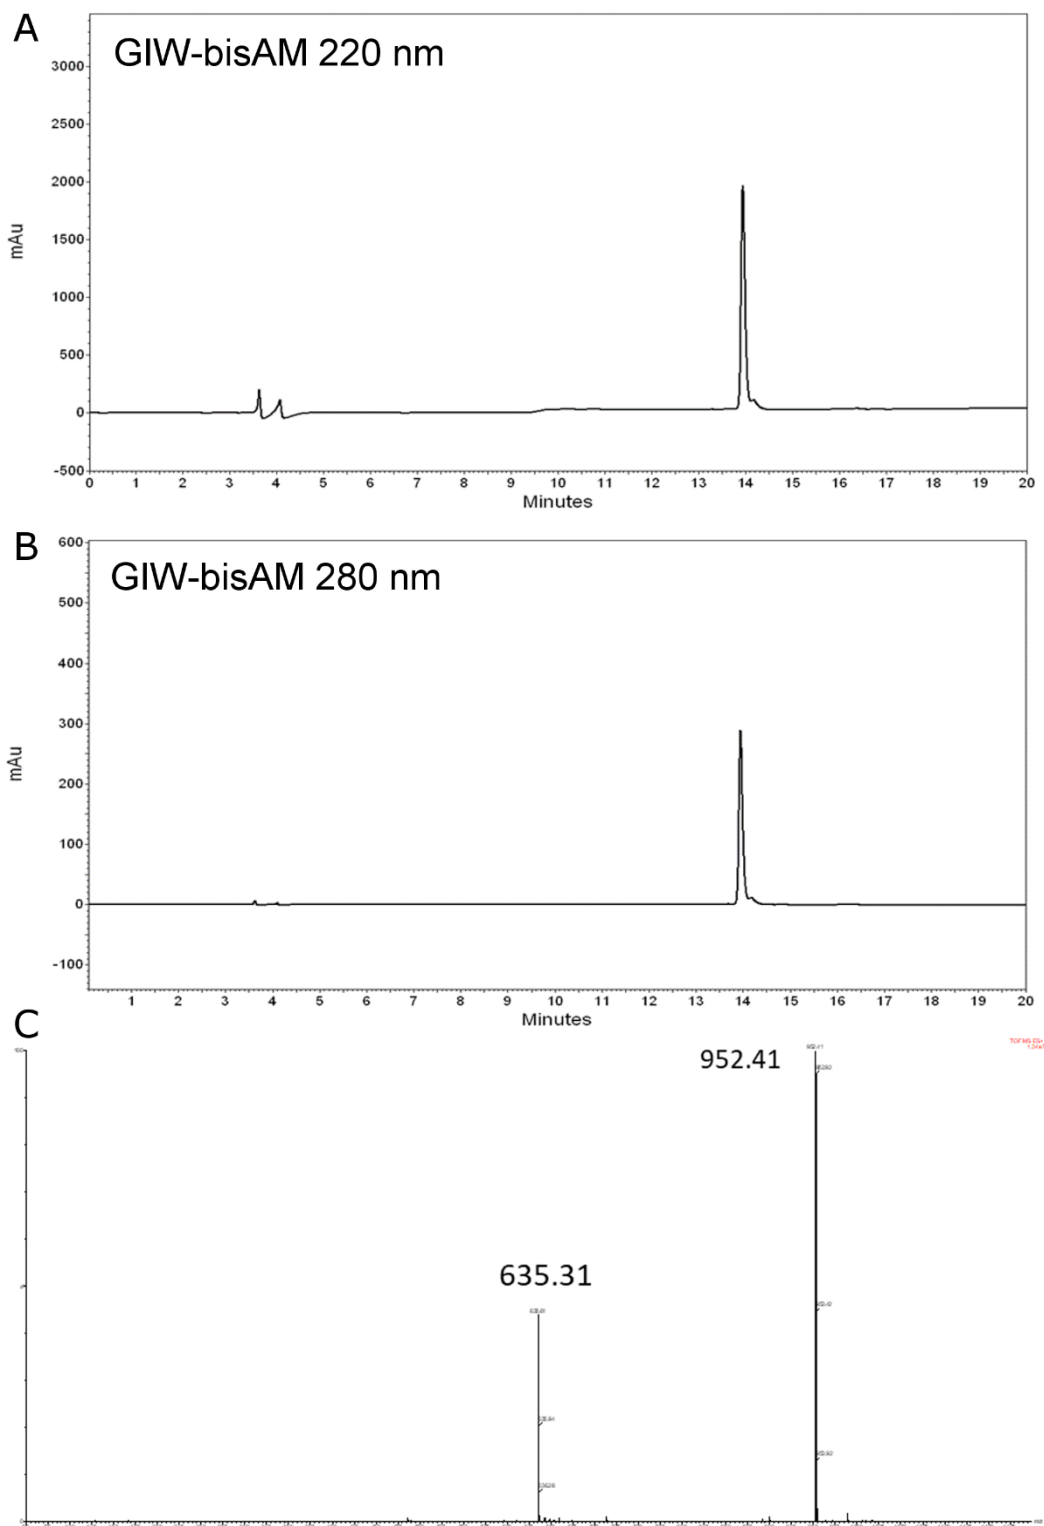

**Figure S3.** Characterization of GIW-bisAM. (A-B): Analytical HPLC trace of GIW-bisAM at 200 nm (A) and 280 nm (B). (C): ESI-MS spectrum confirming the mass of the peptide with a sequence of GK'RDGPQGIWGQDRK'G (K': acrylamide functionalized lysine). Exact Mass= 1902.94; Observed:  $[M+2H]^+ = 952.41$ ,  $[M+3H]^{3+} = 635.31$

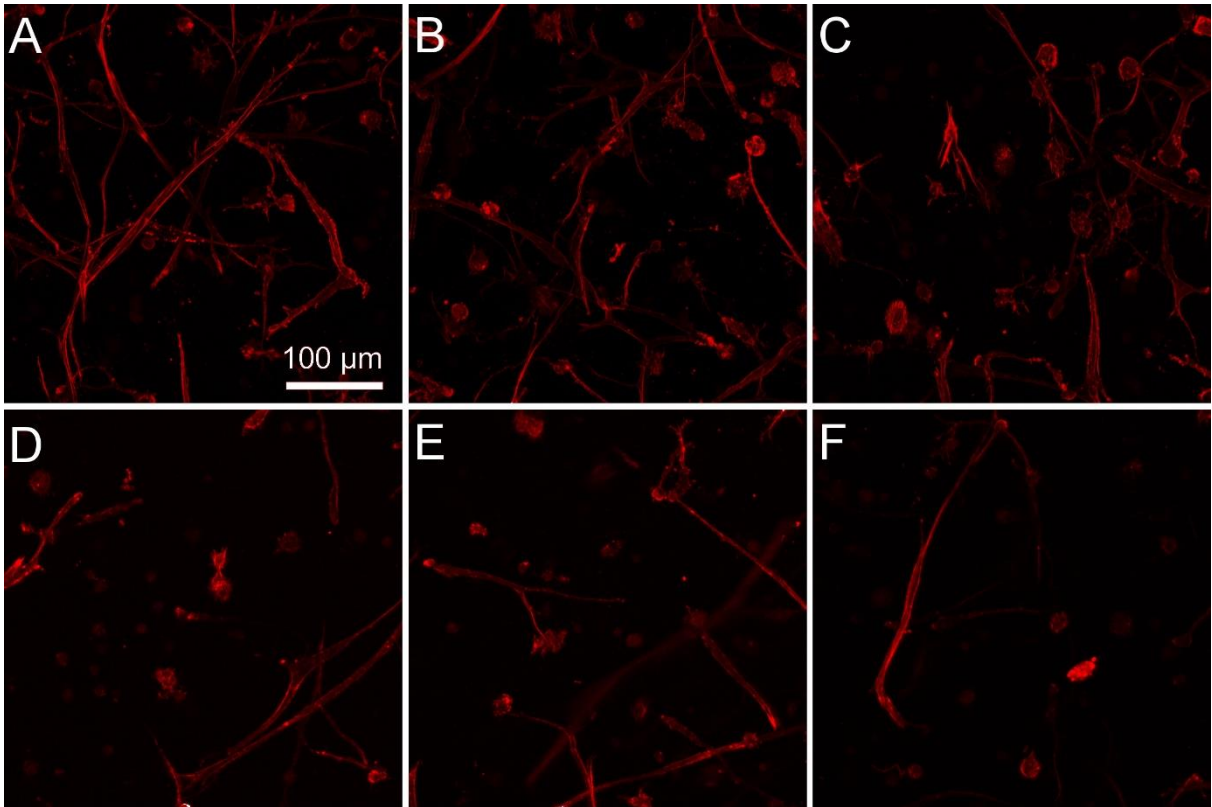

**Figure S4.** Representative confocal images of hMSCs cultured in HA gels for 21 days with (A-C) and without (D-F) CTGF. F-actin was staining by phalloidin-Alexa Fluor 568.

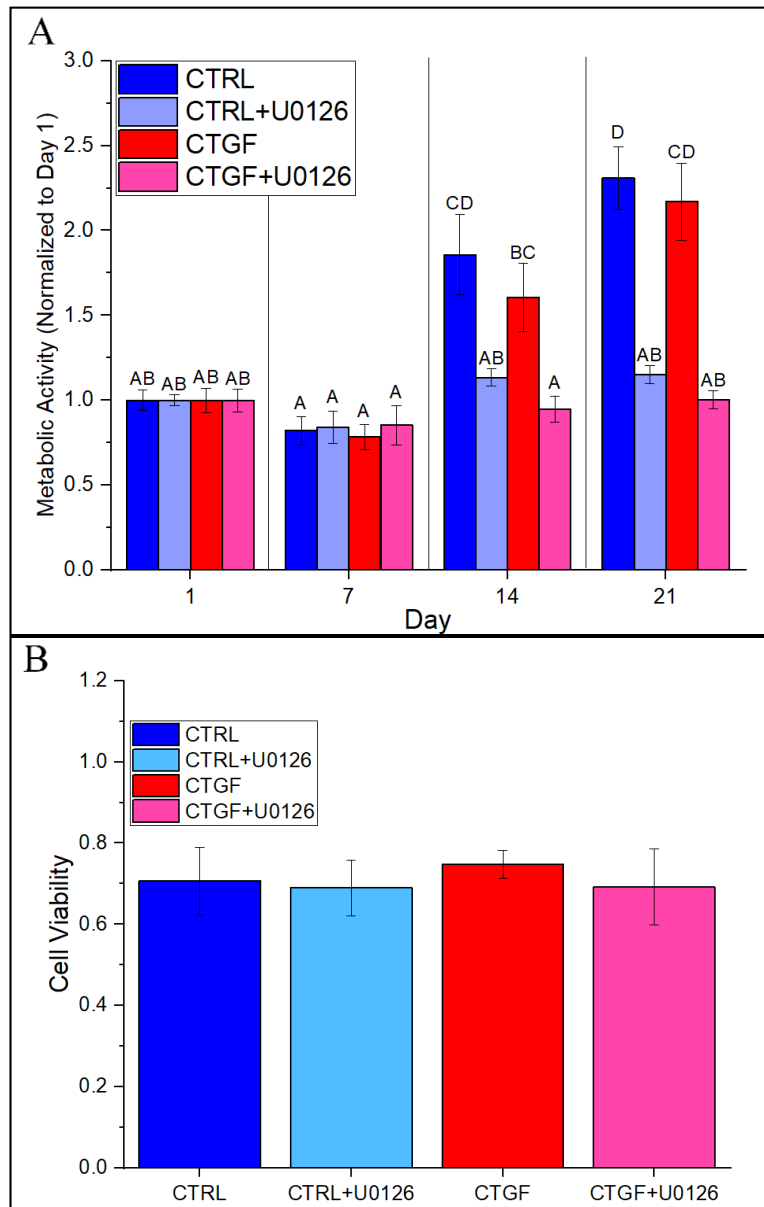

**Figure S5.** Effects of U0126 (20 mM) on cell metabolic activity (A) and viability (B). Metabolic activity was analyzed via PrestoBlue assay on day 1, 7, 14, and 21. Groups without matching letters are considered significant. Cell viability was determined via ImageJ quantification of confocal images after live/dead staining.

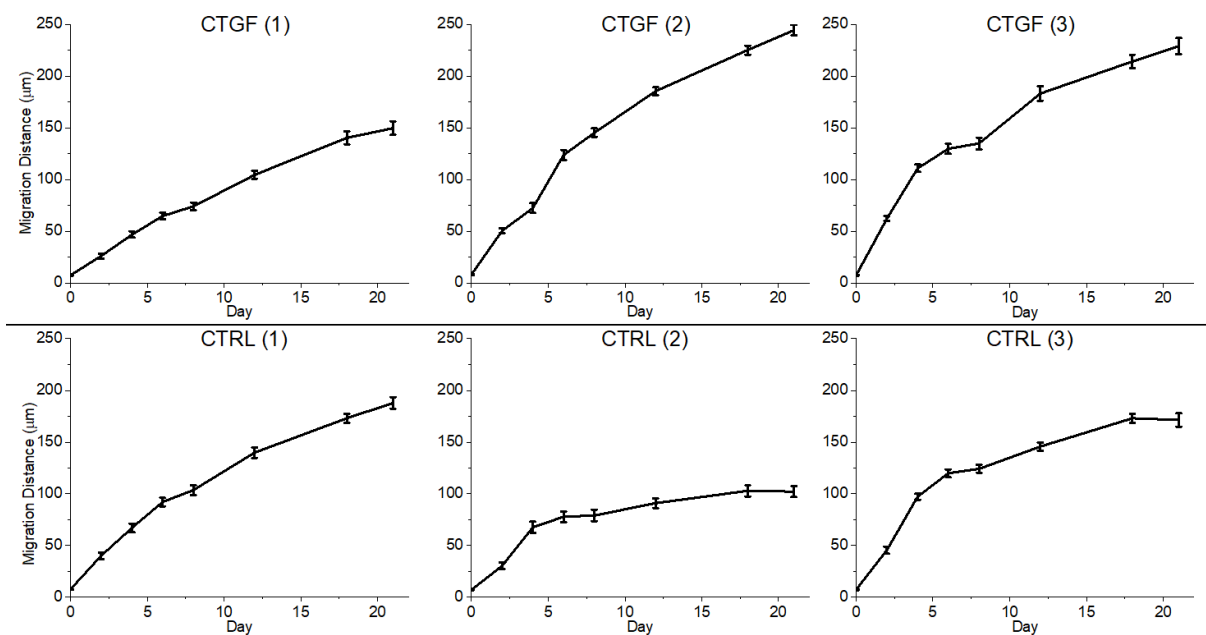

**Figure S6.** Individual cell outgrowth distance per aggregate. The average measured distance and standard error of the mean (SEM) were plotted at each timepoint for 3 CTGF-treated (top) and 3 CTRL samples (bottom).

**Table S1. Summary of qPCR primers.**

| Gene          | Forward Primer<br>(5'-3')    | Reverse Primer<br>(5'-3')    | GeneBank#    | Efficiency | Product Size<br>(bp) |
|---------------|------------------------------|------------------------------|--------------|------------|----------------------|
| <b>GAPDH</b>  | GAAATCCCATCACCAT<br>CTTCCAGG | GAGCCCCAGCCTTCTC<br>CATG     | NM_001289746 | 2.08       | 120                  |
| <b>FN</b>     | ACCTACGGATGACTCG<br>TGCTTTGA | CAAAGCCTAAGCACTG<br>GCACAACA | NM_001306132 | 2.10       | 116                  |
| <b>ITGβ1</b>  | CTACCAACACGCCCTT<br>CATT     | ATGTGAATGCCAAAGC<br>GAAG     | XM_005252448 | 2.03       | 105                  |
| <b>MMP1</b>   | GGGAGATCATCGGGA<br>CAACTC    | GGGCCTGGTTGAAAAG<br>CAT      | NM_001145938 | 2.03       | 72                   |
| <b>MMP2</b>   | GCCAATGGAGACTGT<br>CTCAAGA   | TTCTAAGGCAGCCAGC<br>AGTGAA   | NM_001302510 | 1.87       | 122                  |
| <b>TIMP1</b>  | TTTCTTGGTTCCCCAG<br>AATG     | CAGAGCTGCAGAGCAA<br>CAAG     | NG_012533    | 1.90       | 99                   |
| <b>COL3α1</b> | TGGTGCCCTGGTCC<br>TTGCT      | TACGGGGCAAACCGC<br>CAGC      | NM_000090    | 2.03       | 87                   |
| <b>COL1α1</b> | AATGGTGCTCCTGGTA<br>TTGCTGGT | ACCAGTGTCTCCTTTG<br>CTGCCA   | XM_005257058 | 2.10       | 141                  |
| <b>HAS1</b>   | GTGAGTGGCTGTACAA<br>CGCG     | AGAGGGACGTAGTTAG<br>CGGC     | NM_001523    | 1.91       | 355                  |
| <b>CTGF</b>   | AGGAGTGGGTGTGTG<br>ACGA      | CCAGGCAGTTGGCTCT<br>AATC     | NM_001901    | 1.90       | 117                  |
| <b>HGF</b>    | TCCAGAGGTACGCTAC<br>GAAGTCT  | CCCATTGCAGGTCATG<br>CAT      | NM_001010932 | 1.95       | 70                   |
| <b>TGFβ1</b>  | GCAGAAGTTGGCATG<br>GTAGC     | CCCTGGACACCAACTA<br>TTGC     | XM_011527242 | 1.99       | 131                  |
| <b>VEGFA</b>  | GACAAGAAAATCCCTG<br>TGGGC    | AACGCGAGTCTGTGTT<br>TTTGC    | NM_001287044 | 1.91       | 102                  |
| <b>TNC</b>    | GGGCTGGTTGTATTGA<br>TGCTTT   | AGGGACCACTGGGTGA<br>GAGA     | XM_005251975 | 2.00       | 76                   |
| <b>αSMA</b>   | CCAAGCACTGTCAGG<br>AAT       | AGGCAGTGCTGTCCCTC<br>TT      | NM_001613    | 1.99       | 60                   |
| <b>FAP</b>    | GGTGGATGGTCGAGG<br>AACAGC    | TCCTCCATAGGACCAG<br>CCCCA    | XM_011510796 | 2.01       | 169                  |
| <b>FNEDA</b>  | CCCTAAAGGACTGGC<br>ATTCA     | CATCCTCAGGGCTCGA<br>GTAG     | XM_017003692 | 1.99       | 113                  |
| <b>ELN1</b>   | CCGCTAAGGCAGCCA<br>AGTATGGA  | AGCTCCAACCCCGTAA<br>GTAGGAAT | XM_017011814 | 2.04       | 275                  |
| <b>FSP1</b>   | AGCTTCTTGGGGAAAA<br>GGAC     | CCCCAACCAT<br>CAGAGG         | NM_019554    | 1.98       | 200                  |
| <b>MCAM</b>   | GGGTACCCCATTCCTC<br>AAGT     | CAGTCTGGGACGACTG<br>AATG     | NM_006500    | 1.88       | 91                   |
| <b>VCAM</b>   | AGTTGAAGGATGCGG<br>GAGTAT    | GGATGCAAAATAGAGC<br>ACGAG    | NM_001078    | 1.99       | 143                  |

**Gene abbreviations:** GAPDH, glyceraldehyde-3-phosphate dehydrogenase; FN, fibronectin; ITGβ1: integrin beta 1; MMP1, matrix metalloproteinase 1; MMP2, matrix metalloproteinase 2; TIMP1, tissue inhibitor of metalloproteinase 1; COL3α1, collagen type III alpha-1; COL1α1, collagen type I alpha-1; HAS1, hyaluronic acid synthase 1; CTGF, connective tissue growth factor; HGF, hepatocyte growth factor; TGFβ1, transforming growth factor beta-1; VEGFA, vascular endothelial growth factor-A; TNC, tenascin C; αSMA, alpha-smooth muscle actin; FAP, fibroblast activation protein; FNEDA, fibronectin extra domain-A; ELN, elastin; FSP1, fibroblast specific protein-1; MCAM, melanoma cell adhesion molecule; VCAM, vascular cell adhesion molecule.
